# Supplementary material for: Geochemical constraints on bacteriophage infectivity in terrestrial environments
Source: PubMed Central journal article supplement (PMC10439110; doi:10.1038/s43705-023-00297-7), 2023-08-18
Supplement: 43705_2023_297_MOESM2_ESM.pdf [file 43705_2023_297_MOESM2_ESM.pdf]

## Supplementary Figures:

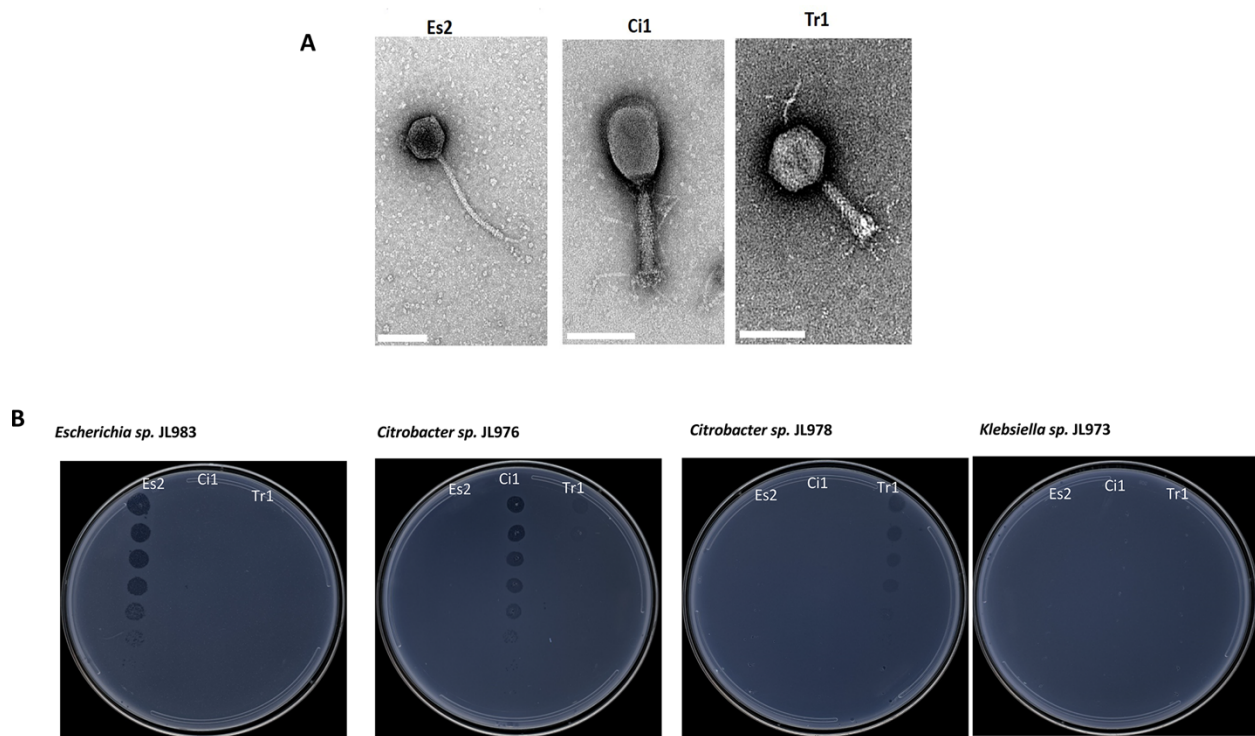

**Figure S1.** Phages in cocktail formulated to inhibit DNRA in freshwater nitrate reducing enrichment (FN) cultures. **A.** Transmission electron micrographs of ES2, Ci1 and Tr1 phages. The scale bar denotes 100 nm **B.** Plaque assays demonstrating specificity of phages for dominant *Enterobacteria* in the FN culture. ES2 is specific for *Escherichia* JL 983, Ci1 is specific for *Citrobacter sp.* JL 976 and Tr1 is specific for *Citrobacter sp.* JL 978.

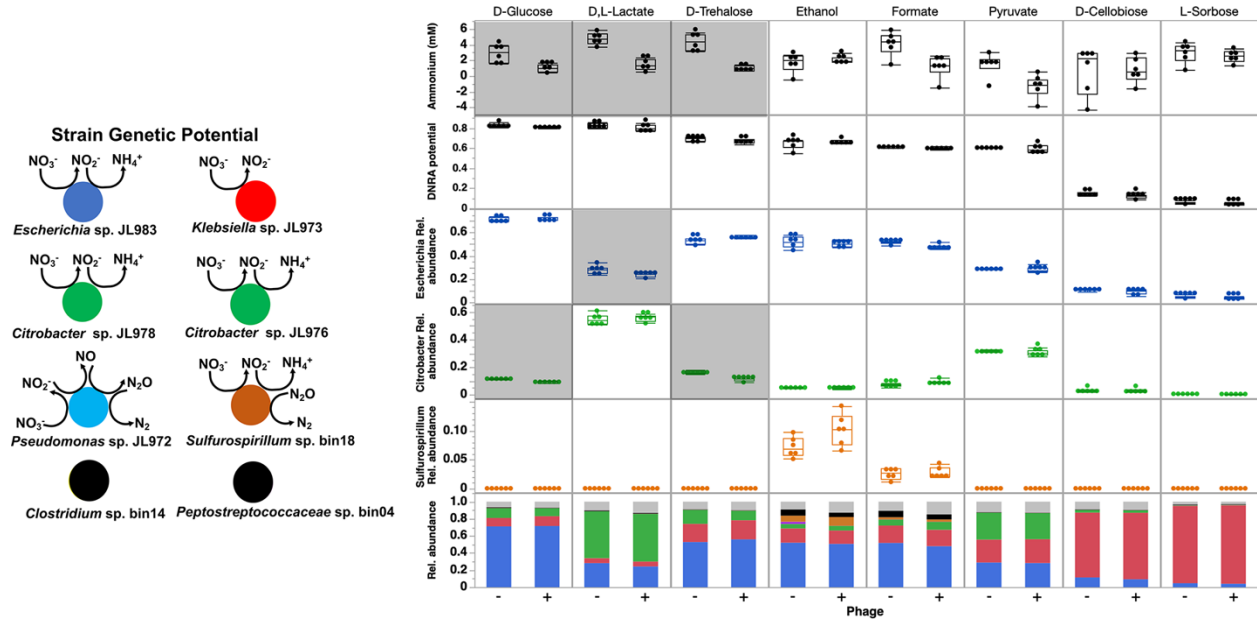

**Figure S2.** Ammonium production, DNRA genetic potential and relative abundances of dominant strains in the FN microbiome on selected carbon sources. In box plots: Box and whiskers represent interquartile range. Shaded panels indicate significant differences (ANOVA,  $p < 0.05$ ) between minus (-) and plus (+) phage conditions. In stacked bar plot: Dark Blue = *Escherichia*, Green = *Citrobacter*, Red = *Klebsiella*, Orange = *Sulfurospirillum*, light blue = *Pseudomonas*, Black = Gram-positive fermenters, Gray = other strains.

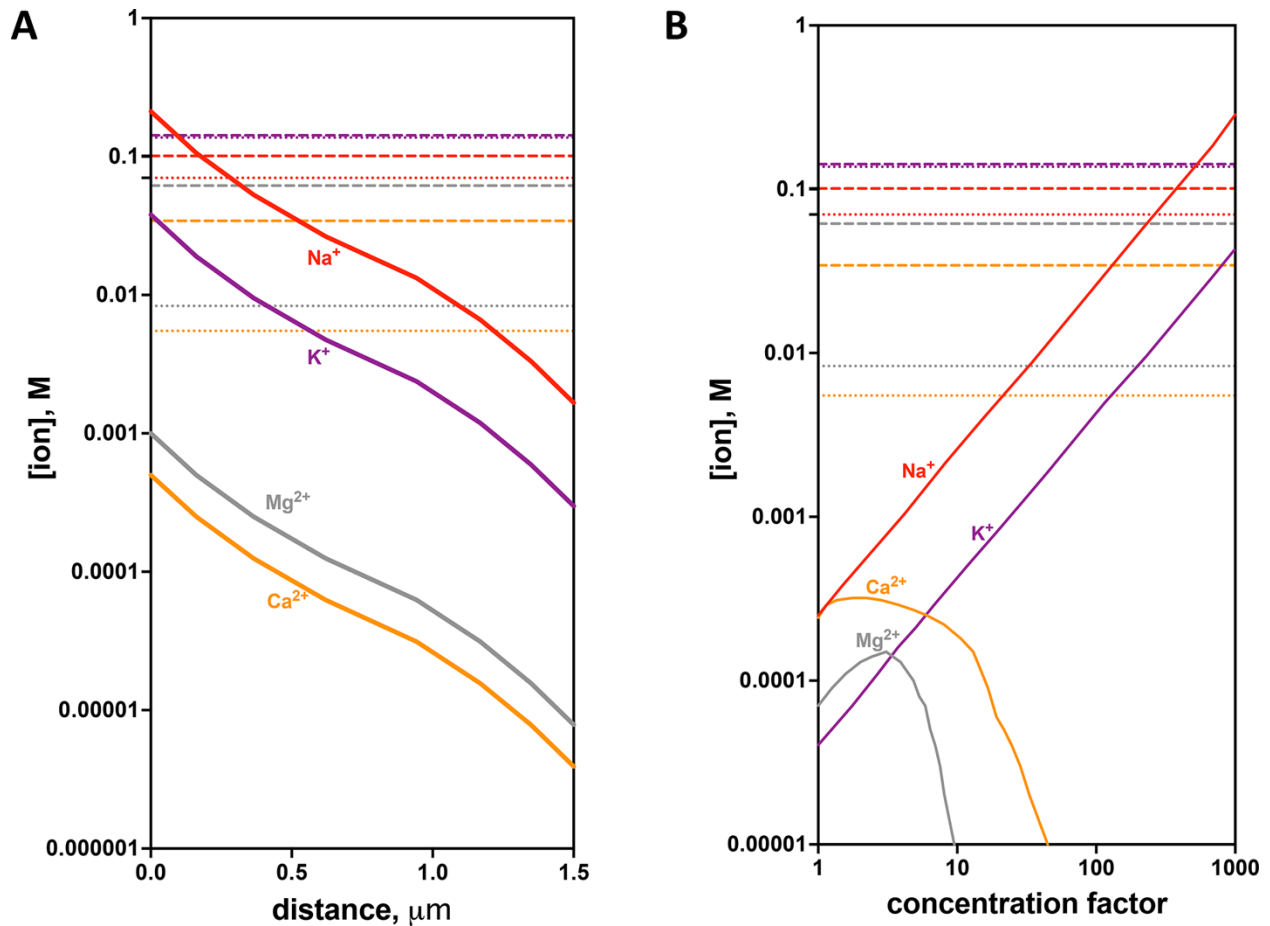

**Figure S3.** Temporal and spatial control of phage infectivity by ion thresholds in terrestrial ecosystems. **A.** Major cytoplasmic ion concentrations as a function of diffusion distance from lysed *E. coli* cells compared with EC<sub>50</sub> concentrations required for T4 (dash), or MS2 (dotted) phage infection. **B.** Major ion concentrations in a typical Sierra Nevada spring water during evaporation as a function of concentration factor compared with phage EC<sub>50</sub>. Colors are consistent between EC<sub>50</sub> and ion concentration lines. (colors and symbols are the same as panel A).
